# Supplementary material for: Photorefractive performances of a graphene-doped PATPD/7-DCST/ECZ composite
Source: Royal Society of Chemistry journal article supplement (doi:10.1039/c4tc00782d), 2014-01-01
Supplement: c4tc00782d1.pdf [file c4tc00782d1.pdf]

## Supporting Information

### Photorefractive performances of a graphene-doped PATPD/7DCST/ECZ composite

*Panit Chantharasupawong, Cory W.Christenson, Reji Philip, Laurene Tetard, Lei Zhai, Jeffrey Winiarz, Michiharu Yamamoto, Rahul R. Nair, Jayan Thomas\**

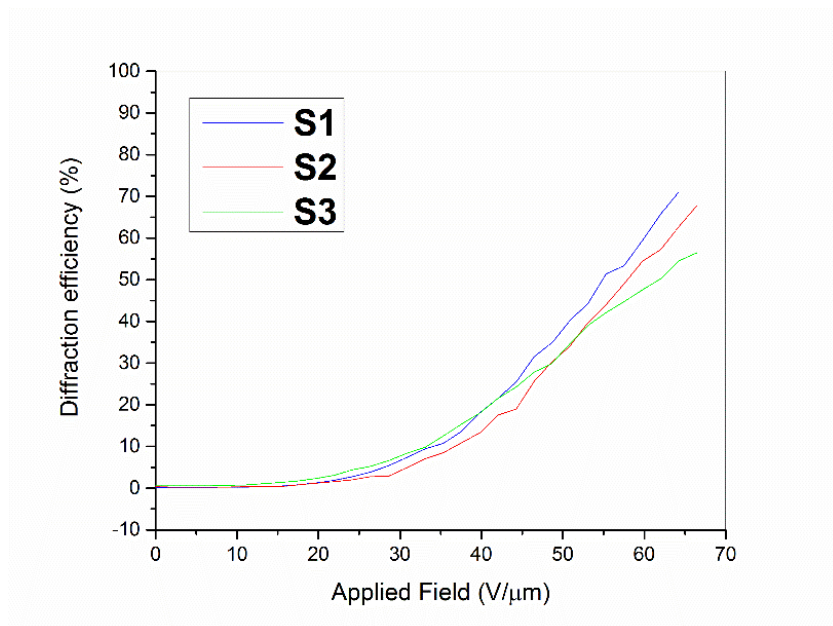

#### 1. Steady state diffraction efficiency

**Figure S1.** Steady state diffraction efficiencies of S1 (undoped), S2 (graphene-doped) and S3 (PCBM-doped). All samples show similar diffraction efficiencies. The efficiencies are calculated from Equation(4).
